# Supplementary material
Source: Springer Nature journal article supplement (https://www.springermedizin.de/resource/supplementary/12885_2010_2707_MOESM9_ESM.pdf/9461784)

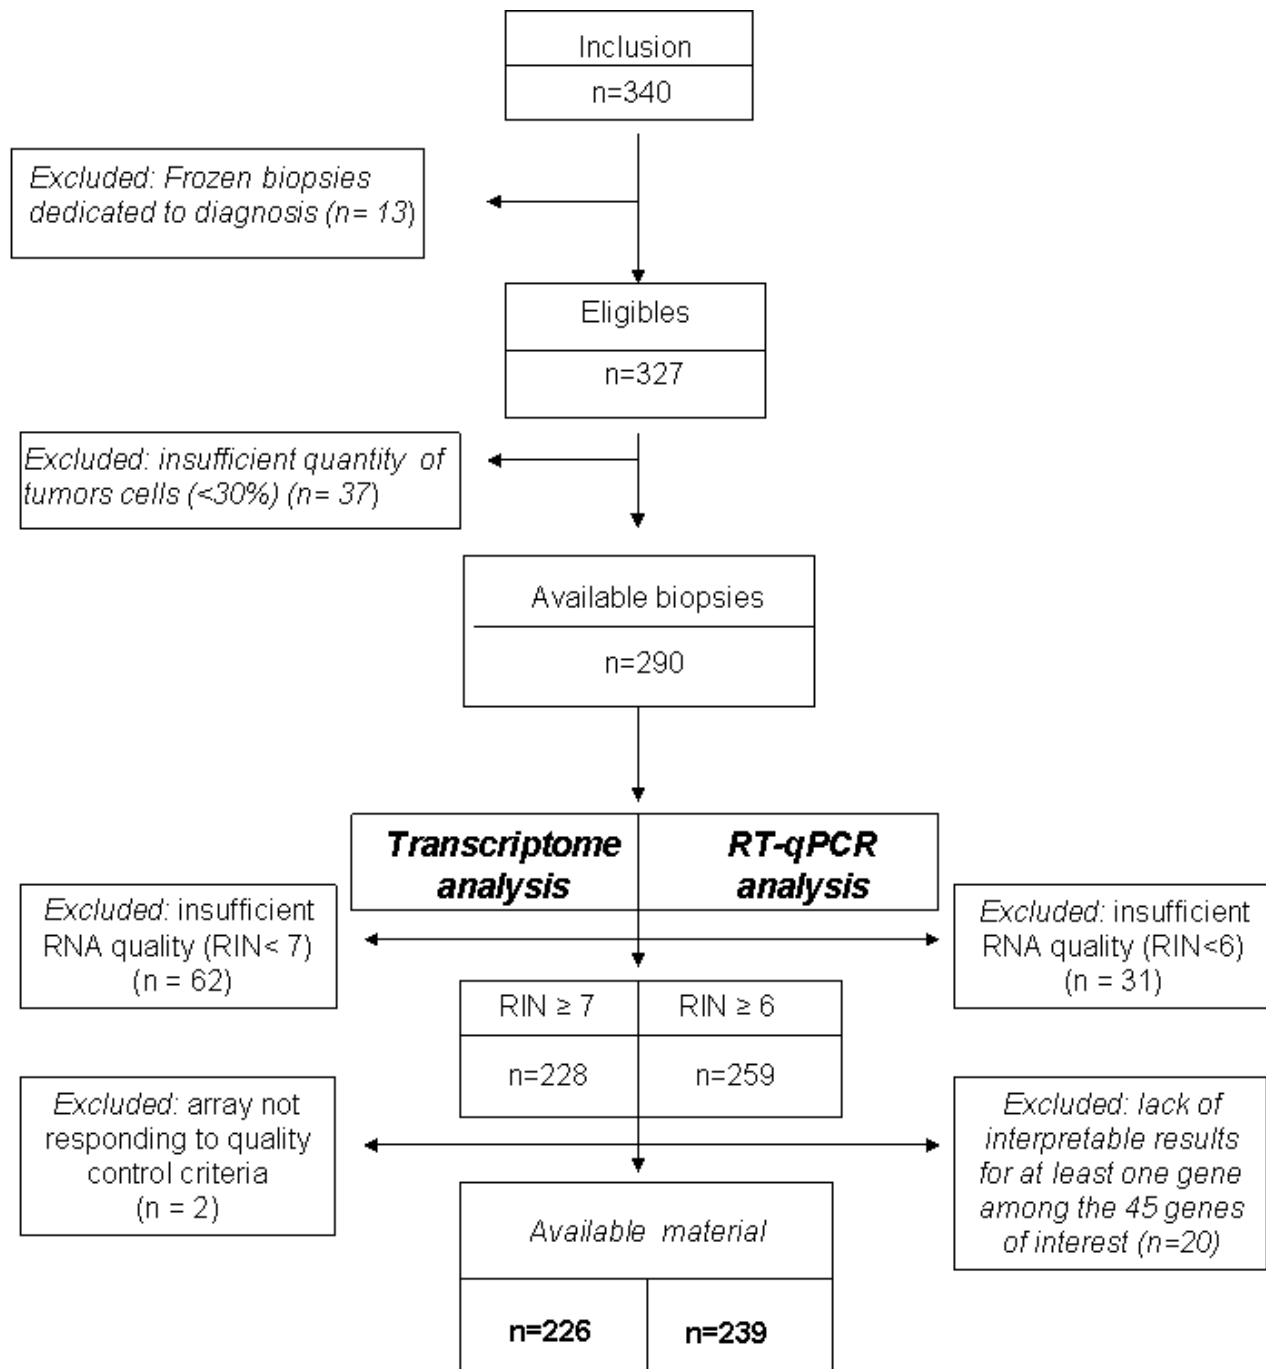

Supplement: MOESM9 [file 9461784]
